# Supplementary material for: Gut microbiota links with cognitive impairment in amyotrophic lateral sclerosis: A multi-omics study
Source: PubMed Central journal article supplement (PMC10018415; doi:10.7555/jbr.36.20220198), 2022-12-28
Supplement: jbr-37-125-S1.pdf [file jbr-37-125-S1.pdf]

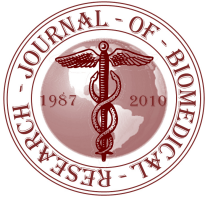

# Gut microbiota links with cognitive impairment in amyotrophic lateral sclerosis: a multi-omics study

Zhenxiang Gong<sup>1</sup>, Li Ba<sup>1</sup>, Jiahui Tang<sup>1</sup>, Yuan Yang<sup>1</sup>, Zehui Li<sup>1</sup>, Mao Liu<sup>3</sup>, Chun Yang<sup>4</sup>, Fengfei Ding<sup>1,2,✉</sup>, Min Zhang<sup>1,✉</sup>

<sup>1</sup>Department of Neurology and Psychiatry, Tongji Hospital, Tongji Medical College, Huazhong University of Science and Technology, Wuhan, Hubei 430030, China;

<sup>2</sup>Department of Pharmacology, School of Basic Medical Sciences, Fudan University, Shanghai 200433, China;

<sup>3</sup>Department of Neurology, SUNY Downstate Medical Center, NY 11226, United States;

<sup>4</sup>Department of Anesthesiology and Perioperative Medicine, the First Affiliated Hospital of Nanjing Medical University, Nanjing, Jiangsu 210029, China.

**Supplementary Table 1 Inclusion and exclusion criteria**

| Items              | Criteria                                                                                                                                                                                                                                                                                                                                                                                                                                                                                                                                                                                |
|--------------------|-----------------------------------------------------------------------------------------------------------------------------------------------------------------------------------------------------------------------------------------------------------------------------------------------------------------------------------------------------------------------------------------------------------------------------------------------------------------------------------------------------------------------------------------------------------------------------------------|
| Inclusion criteria | 1. Clinically definite or probable ALS (revised El Escorial criteria)<br>2. 18 < age < 75 years<br>3. 18 < BMI < 28 kg/m <sup>2</sup>                                                                                                                                                                                                                                                                                                                                                                                                                                                   |
| Exclusion criteria | 1. Any possible evidence for familial amyotrophic lateral sclerosis (fALS)<br>2. With other neurodegenerative diseases, such as Alzheimer's disease (AD), Parkinson's disease (PD), Huntington's disease (HD), etc.<br>3. With definite gastrointestinal diseases, heart failure, acute infection, tumor, immunodeficiency and autoimmune diseases<br>4. Any use of antibiotics within the last month<br>5. Regular drinking of commercial probiotics within the last year or any drinking of commercial probiotics within the last week<br>6. Obvious symptoms of dysphagia or dyspnea |

**Supplementary Table 2 Relative abundance at phylum level between ALS and HC**

| Phylum          | ALS                  | HC                   | P-value |
|-----------------|----------------------|----------------------|---------|
| Actinobacteria  | 5.63 (1.66, 13.73)   | 2.87 (0.87, 5.85)    | 0.053   |
| Bacteroidetes   | 2.62 (0.42, 9.65)    | 3.99 (1.37, 15.57)   | 0.125   |
| Firmicutes      | 78.78 (62.53, 86.54) | 66.55 (45.64, 81.42) | 0.075   |
| Proteobacteria  | 1.56 (0.87, 10.33)   | 7.78 (1.22, 33.45)   | 0.026   |
| Verrucomicrobia | 0 (0, 0.01)          | 0 (0, 0)             | 0.689   |
| F/B             | 29.07 (6.47, 138.63) | 18.32 (3.72, 64.07)  | 0.092   |

Data are presented as median (25% quantile, 75% quantile). P-values were calculated by Mann-Whitney U-test. ALS: amyotrophic lateral sclerosis; HC: healthy control; F/B: Firmicutes/Bacteroidetes.

✉Corresponding authors: Fengfei Ding, Department of Pharmacology, School of Basic Medical Sciences; State Key Laboratory of Medical Neurobiology and MOE Frontiers Center for Brain Science, Institutes of Brain Science, Shanghai Medical College, Fudan University, 130 Dong'an Road, Xuhui District, Shanghai 200032, China. Tel: +86-21-54237900, E-mail: fengfei\_ding@fudan.edu.cn; Min Zhang, Department of Neurology and Psychiatry, Tongji Hospital, Tongji Medical College, Huazhong University of Science and Technology, 1095 Jiefang Road, Qiaokou District, Wuhan, Hubei 430030, China. Tel: +86-27-83663895, E-mail: zhang\_min\_3464@126.com.

Received: 07 September 2022; Revised: 05 November 2022; Accepted: 22 November 2022; Published online: 28 December 2022

CLC number: R744.8, Document code: A

The authors reported no conflict of interests.

This is an open access article under the Creative Commons Attribution (CC BY 4.0) license, which permits others to distribute, remix, adapt and build upon this work, for commercial use, provided the original work is properly cited.

| Phylum          | CN                   | CI                   | P-value |
|-----------------|----------------------|----------------------|---------|
| Actinobacteria  | 10.88 (5.63, 26.45)  | 1.9 (1.27, 9.20)     | 0.066   |
| Bacteroidetes   | 1.79 (0.21, 8.49)    | 8.95 (2.35, 16.14)   | 0.039   |
| Firmicutes      | 80.69 (62.54, 86.85) | 74.68 (52.59, 84.97) | 0.383   |
| Proteobacteria  | 1.29 (0.32, 5.67)    | 1.51 (1.14, 14.35)   | 0.215   |
| Verrucomicrobia | 0 (0, 0)             | 0 (0, 43.20)         | 0.033   |
| F/B             | 45.55 (8.59, 368.50) | 9.10 (3.47, 32.30)   | 0.022   |

Data are presented as median (25% quantile, 75% quantile). P-values were calculated by Mann-Whitney U-test. CN: normal cognition; CI: cognitive impairments; F/B, Firmicutes/Bacteroidetes.

| Phylum          | BVN                  | BVI                  | P-value |
|-----------------|----------------------|----------------------|---------|
| Actinobacteria  | 10.92 (3.30, 15.97)  | 3.90 (1.03, 17.38)   | 0.106   |
| Bacteroidetes   | 1.91 (0.15, 9.68)    | 5.18 (0.61, 13.49)   | 0.348   |
| Firmicutes      | 79.04 (53.69, 86.55) | 76.47 (64.32, 87.47) | 0.485   |
| Proteobacteria  | 1.24 (0.32, 4.14)    | 2.49 (0.82, 9.40)    | 0.256   |
| Verrucomicrobia | 0 (0, 0.09)          | 0 (0, 0)             | 0.114   |
| F/B             | 45.40 (6.58, 368.69) | 18.79 (5.61, 174.30) | 0.458   |

Data are presented as median (25% quantile, 75% quantile). P-values were calculated by Mann-Whitney U-test. BVN: behavior normal; BVI: behavior impaired; F/B, Firmicutes/Bacteroidetes.

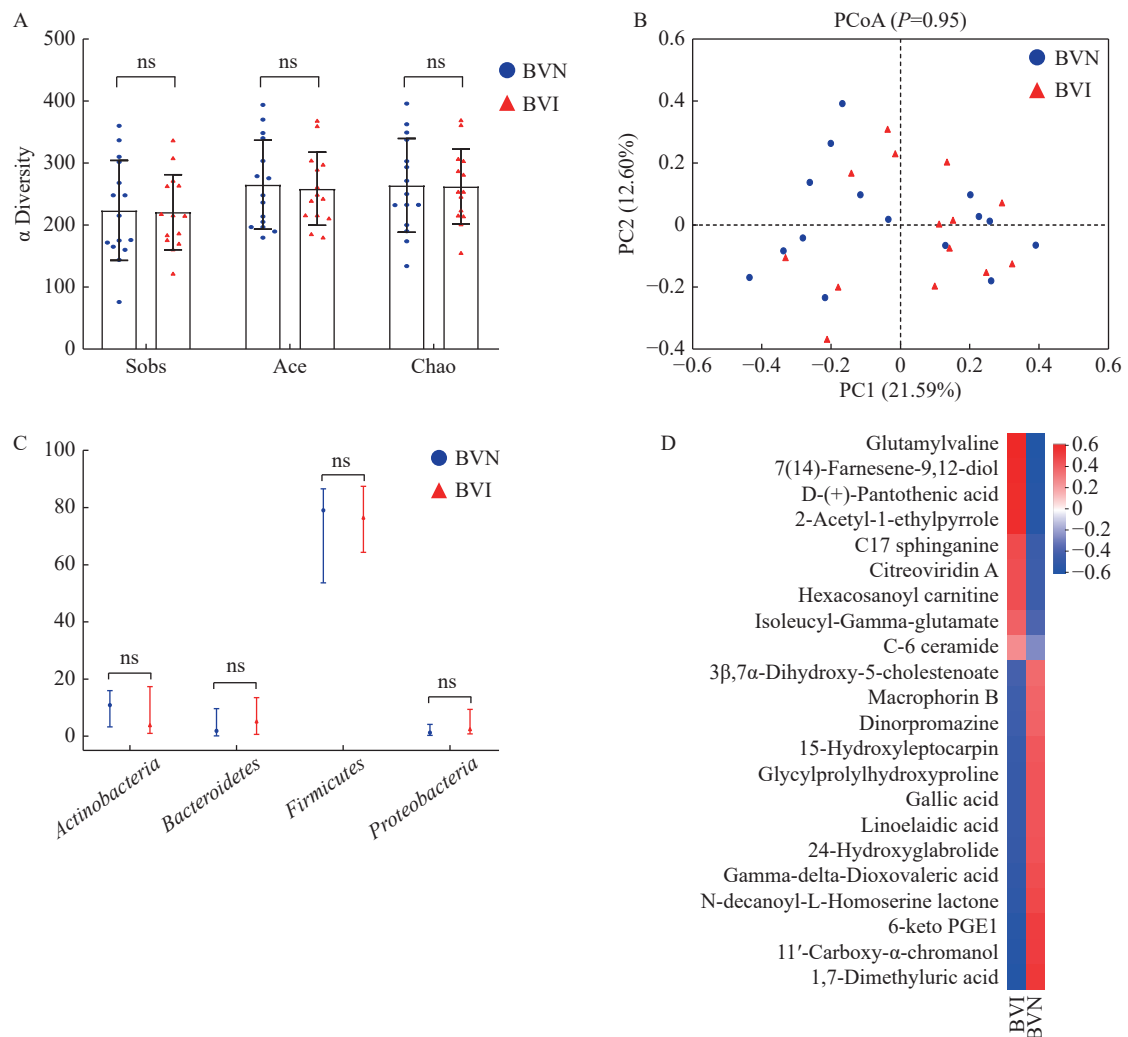

**Supplementary Fig. 1** Difference in microbial community and fecal metabolites between patients with BVN or BVI. ns: not significant; BVN: behavior normal; BVI: behavior impaired.

**Supplementary Table 5 Comparison of 46 fecal bile acids between CN and CI**

| Bile acid                                             | CN (ng/g)                       | CI (ng/g)                       | Effect size | P-value |
|-------------------------------------------------------|---------------------------------|---------------------------------|-------------|---------|
| Deoxycholic acid                                      | 19 303.91 (11 950.51)           | 16 824.23 (8 588.38)            | 0.580       | 0.567   |
| Hyodeoxycholic acid                                   | 4 257.27 (2 358.58)             | 2 947.85 (2 192.8)              | 1.454       | 0.157   |
| Alpha-Muricholic acid                                 | 36.88 (19.05)                   | 17.45 (14.45)                   | 2.818       | 0.009   |
| Lithocholic acid                                      | 20 577.58 (16 757.16)           | 22 749.48 (13 842.67)           | -0.351      | 0.728   |
| Isoodeoxycholic acid                                  | 0.58 (0.26)                     | 0.65 (0.27)                     | -0.691      | 0.495   |
| Glycocholic acid                                      | 440.68 (163.06, 1 255.82)       | 99.83 (39.4, 577.28)            | -2.294      | 0.022   |
| Glycochenodeoxycholic acid                            | 746.89 (398.69, 1 124.03)       | 218.68 (100.81, 428.34)         | -2.845      | 0.004   |
| Taurocholic acid                                      | 179.14 (58.02, 800.7)           | 59.28 (11.74, 232.33)           | -1.606      | 0.108   |
| Taurochenodeoxycholic acid                            | 220.9 (120.53, 407.36)          | 77.85 (32.10, 223.88)           | -2.294      | 0.022   |
| Glycoursodeoxycholic acid                             | 268.64 (106.39, 602.2)          | 28.84 (23.06, 267.43)           | -2.661      | 0.008   |
| Allocholic Acid                                       | 1 591.32 (212.42, 2 767.59)     | 152.17 (74.74, 1 402.8)         | -2.065      | 0.039   |
| Ursodeoxycholic acid                                  | 6 091.26 (1 900.69, 9 848.19)   | 2 003.6 (708.65, 7027)          | -1.652      | 0.099   |
| Tauroursodeoxycholic acid                             | 24.58 (7.75, 95.88)             | 2.04 (1.15, 32.88)              | -2.340      | 0.019   |
| apocholic acid                                        | 10.08 (0, 26.02)                | 8.65 (0, 31.35)                 | -0.048      | 0.962   |
| Glycodeoxycholic acid                                 | 402.58 (37.63, 790.16)          | 96.53 (63.79, 486.55)           | -1.101      | 0.271   |
| Glycolithocholic acid                                 | 32.33 (2.50, 96.5)              | 18.96 (3.71, 70.08)             | -0.367      | 0.714   |
| Beta-Muricholic acid                                  | 988.52 (398.5, 2 676.31)        | 265.4 (226.12, 1 015.36)        | -1.973      | 0.048   |
| 7-ketoLithocholic acid                                | 3 267.56 (1 118.73, 7 681.85)   | 992.11 (398.15, 6 928.47)       | -1.285      | 0.199   |
| Tauro- $\alpha$ -muricholic acid                      | 3.1 (1.16, 33.16)               | 3.33 (1.15, 26.78)              | 0.000       | 1.000   |
| Tauro- $\beta$ -muricholic acid                       | 1.97 (1.27, 13.89)              | 1.79 (0.73, 5.50)               | -0.918      | 0.359   |
| Omega-Muricholic acid                                 | 519.93 (68.46, 1 856.2)         | 64.27 (30.5, 545.63)            | -1.468      | 0.142   |
| murideoxycholic acid                                  | 168.62 (81.52, 382.15)          | 153.25 (44.74, 267.45)          | -0.826      | 0.409   |
| Taurohyodeoxycholic acid                              | 25.91 (10.84, 120.13)           | 2.44 (0.94, 33.75)              | -2.478      | 0.013   |
| Taurohyocholic acid                                   | 1.04 (0.48, 3.39)               | 1.04 (0.28, 2.30)               | -0.596      | 0.551   |
| taurolithocholic acid                                 | 16.58 (4.34, 23.81)             | 8.56 (1.47, 12.04)              | -1.422      | 0.155   |
| Taurodeoxycholate acid                                | 38.45 (26.23, 175.27)           | 18.72 (1.4, 47.88)              | -1.606      | 0.108   |
| Cholic acid                                           | 17 476.93 (3 392.46, 31 117.48) | 2 298.26 (402.65, 15 086.72)    | -2.111      | 0.035   |
| Chenodeoxycholic acid                                 | 13 405.17 (4 045.43, 23 799.13) | 2 222.42 (541.38, 13 613.2)     | -2.386      | 0.017   |
| hyocholic acid                                        | 1 466.61 (361.96, 2 853.8)      | 624.34 (157, 1 510.36)          | -1.331      | 0.183   |
| norcholic acid                                        | 131.32 (84.62, 299.36)          | 55.98 (35.71, 157.43)           | -2.019      | 0.044   |
| Glycohyocholic acid                                   | 2.4 (1.36, 5.34)                | 0.39 (0.34, 1.03)               | -3.349      | 0.001   |
| 23-Nordeoxycholic acid                                | 9.41 (0.55, 26.8)               | 15.46 (0.80, 30.39)             | -0.322      | 0.747   |
| isolithocholic acid                                   | 14 864.25 (231.85, 26 994.75)   | 22 587.64 (9 516.01, 37 160.78) | -0.918      | 0.359   |
| 12-ketolithocholic acid                               | 54.94 (38.6, 131.63)            | 70.61 (40.55, 126.74)           | -0.184      | 0.854   |
| dehydrolithocholic acid                               | 956.96 (131.08, 4 816.54)       | 3 270.94 (2 033.57, 6 014.95)   | -0.780      | 0.435   |
| Lithocholic acid 3-sulfate                            | 2 337.19 (941.51, 8 830.24)     | 461.87 (122.87, 3 939.11)       | -2.111      | 0.035   |
| Chenodeoxycholic acid-3- $\beta$ -D-glucuronide       | 99.43 (65.40, 343)              | 86.85 (50.45, 137.36)           | -1.055      | 0.291   |
| 3 $\beta$ -Ursodeoxycholic acid                       | 2 322.27 (546.43, 4 058.25)     | 1 046.1 (165.36, 4 834.84)      | -0.780      | 0.435   |
| 3-Dehydrocholic acid                                  | 472.57 (114.00, 4 138.09)       | 102.71 (12.98, 792.39)          | -1.927      | 0.054   |
| Chenodeoxycholic Acid 24-Acyl- $\beta$ -D-glucuronide | 3.14 (1.22, 9.08)               | 0.39 (0.20, 4.19)               | -2.065      | 0.039   |
| 12-ketochenodeoxycholic acid                          | 1 768.2 (369.24, 16 349.26)     | 406.47 (109.68, 1 929.66)       | -1.698      | 0.090   |
| 7,12-Diketolithocholic acid                           | 80.62 (25.98, 221.79)           | 26.79 (8.34, 62.82)             | -1.927      | 0.054   |
| Dehydrocholic acid                                    | 2.27 (1.38, 3.62)               | 1.85 (1.04, 4.53)               | -0.849      | 0.396   |
| Ursocholic acid                                       | 10 507.16 (1 377.77, 23 380.96) | 1 094.41 (202.85, 9 942.72)     | -1.514      | 0.130   |
| 7-ketodeoxycholic acid                                | 2 642.46 (1 795.27, 17 525.9)   | 1 216.89 (338.84, 9 486.95)     | -1.331      | 0.183   |
| 3 $\beta$ -Cholic acid                                | 4 237.48 (769.19, 9 479.69)     | 1 037.88 (137.85, 5 457.19)     | -1.331      | 0.183   |

Data are presented as median (25% quantile, 75% quantile). P-values were calculated by Mann-Whitney U-test. CN: normal cognition; CI: cognitive impairments.

| Bile acid                                             | BVN                             | BVI                              | Effect size | P-value |
|-------------------------------------------------------|---------------------------------|----------------------------------|-------------|---------|
| Ursodeoxycholic acid                                  | 6 199.46 (4 564.13)             | 4 524.07 (3 635.19)              | 1.088       | 0.286   |
| Deoxycholic acid                                      | 17 531.73 (11 921.98)           | 19 431.47 (9 840.22)             | -0.466      | 0.645   |
| Hyodeoxycholic acid                                   | 4 253.34 (2 547.17)             | 3 326.18 (2 104.63)              | 1.064       | 0.297   |
| Alpha-Muricholic acid                                 | 29.53 (19.37)                   | 30.89 (20.79)                    | -0.183      | 0.856   |
| Dehydrocholic acid                                    | 1.9 (1.02)                      | 3.8 (3.03)                       | -2.233      | 0.040   |
| Glycocholic acid                                      | 424.7 (146.61, 897.75)          | 297.86 (84.73, 747.25)           | -0.611      | 0.541   |
| Glycochenodeoxycholic acid                            | 496.08 (391.04, 1 124.03)       | 383.57 (179.72, 1 089.59)        | -0.786      | 0.432   |
| Taurocholic acid                                      | 325.08 (24.96, 787.05)          | 80 (37.63, 351.23)               | -0.655      | 0.513   |
| Taurochenodeoxycholic acid                            | 220.9 (103.44, 585.21)          | 101.48 (70.35, 281.97)           | -1.047      | 0.295   |
| Glycoursodeoxycholic acid                             | 268.09 (45.77, 383.54)          | 151.62 (28.09, 561.74)           | -0.349      | 0.727   |
| Allocholic Acid                                       | 1 215.52 (119.89, 2 767.59)     | 639.79 (104.84, 1 875.25)        | -0.742      | 0.458   |
| Tauroursodeoxycholic acid                             | 24.58 (3.08, 95.88)             | 16.4 (2.12, 29.85)               | -0.480      | 0.631   |
| apocholic acid                                        | 10.08 (0, 26.02)                | 8.65 (0, 31.16)                  | 0.000       | 1.000   |
| Glycodeoxycholic acid                                 | 331.64 (37.63, 734.99)          | 346.07 (73.91, 783.53)           | -0.262      | 0.793   |
| Glycolithocholic acid                                 | 9.44 (1.99, 96.5)               | 35.95 (5.96, 70.84)              | -0.742      | 0.458   |
| Beta-Muricholic acid                                  | 733.54 (254.82, 2 676.31)       | 680.26 (263.99, 1 071.89)        | -0.262      | 0.793   |
| 7-ketoLithocholic acid                                | 5 575.11 (616.49, 7 681.85)     | 2 602.89 (830, 4 803.18)         | -0.524      | 0.600   |
| Tauro- $\alpha$ -muricholic acid                      | 3.1 (1.16, 46.42)               | 3.78 (1.35, 15.59)               | -0.175      | 0.861   |
| Tauro- $\beta$ -muricholic acid                       | 1.97 (1.18, 13.89)              | 2.11 (0.97, 5.17)                | -0.349      | 0.727   |
| Omega-Muricholic acid                                 | 426.57 (30.57, 2 071.08)        | 250.69 (45.24, 672.18)           | -0.436      | 0.663   |
| murideoxycholic acid                                  | 183.13 (56.95, 382.15)          | 152.46 (71.67, 332.42)           | -0.393      | 0.694   |
| Taurohyodeoxycholic acid                              | 29.2 (4.40, 120.13)             | 15.94 (2.81, 28.57)              | -0.698      | 0.485   |
| Taurohyocholic acid                                   | 1.05 (0.57, 1.8)                | 0.85 (0.29, 3.07)                | -0.436      | 0.663   |
| tauroolithocholic acid                                | 8.25 (1.69, 16.77)              | 12.12 (5.69, 33.38)              | -1.528      | 0.127   |
| Taurodeoxycholate acid                                | 29.66 (8.54, 62.64)             | 44.53 (14.14, 182.28)            | -0.742      | 0.458   |
| Lithocholic acid                                      | 14 529.43 (1 612.12, 38 816.5)  | 27 715.41 (18 640, 30 730.43)    | -0.786      | 0.432   |
| Cholic acid                                           | 25 852.42 (903.55, 31 117.48)   | 7 784.96 (977.27, 18 338.82)     | -1.004      | 0.315   |
| Chenodeoxycholic acid                                 | 18 067.76 (2 562.88, 23 246.58) | 4 818.78 (1 966.83, 15 016.37)   | -0.960      | 0.337   |
| hyocholic acid                                        | 446.78 (253.43, 2 558.18)       | 1 157.54 (569.66, 3 218.12)      | -0.960      | 0.337   |
| norcholic acid                                        | 151.76 (57.89, 224.69)          | 89.85 (47.67, 178.17)            | -0.873      | 0.383   |
| Glycohyocholic acid                                   | 1.49 (0.68, 3.03)               | 1.29 (0.40, 4.61)                | -0.044      | 0.965   |
| 23-Nordeoxycholic acid                                | 15.51 (0.55, 27.53)             | 9.64 (3.65, 26.11)               | -0.175      | 0.861   |
| isolithocholic acid                                   | 4 499.56 (231.85, 37 278.71)    | 20 873.81 (10 639.70, 28 829.47) | -0.742      | 0.458   |
| 12-ketolithocholic acid                               | 53.38 (38.60, 112.34)           | 73.75 (40.63, 138.57)            | -0.567      | 0.570   |
| dehydrolithocholic acid                               | 460.18 (34.53, 4 816.54)        | 2 913.2 (842.86, 5 523.13)       | -0.786      | 0.432   |
| Lithocholic acid 3-sulfate                            | 1 982.18 (642.94, 7 149.78)     | 1 547.74 (365.88, 6 979.24)      | -0.349      | 0.727   |
| Chenodeoxycholic acid-3- $\beta$ -D-glucuronide       | 97.7 (55.50, 239.3)             | 96.95 (50.45, 376.51)            | -0.175      | 0.861   |
| 3 $\beta$ -Ursodeoxycholic acid                       | 1 875.87 (439.07, 4 315.57)     | 1 733.41 (451.54, 4 076.74)      | -0.131      | 0.896   |
| 3-Dehydrocholic acid                                  | 712.52 (37.96, 4 138.09)        | 199.85 (58.99, 850.56)           | -0.524      | 0.600   |
| Chenodeoxycholic Acid 24-Acyl- $\beta$ -D-glucuronide | 3.74 (0.43, 31.85)              | 0.89 (0.38, 3.51)                | -1.528      | 0.127   |
| 12-ketochenodeoxycholic acid                          | 1 671.12 (107.12, 16 349.26)    | 893.87 (322.93, 3 059.98)        | -0.044      | 0.965   |
| 7,12-Diketolithocholic acid                           | 37.05 (16.77, 126.75)           | 57.79 (22.29, 221.36)            | -0.524      | 0.600   |
| Ursocholic acid                                       | 7 879.37 (242.21, 30 668.33)    | 6 522.81 (1 344.95, 12 188.63)   | -0.175      | 0.861   |
| 7-ketodeoxycholic acid                                | 6 695.79 (265.09, 17 525.9)     | 2 459.53 (667.74, 6 547.47)      | -0.480      | 0.631   |
| Isodeoxycholic acid                                   | 0.54 (0.40, 0.85)               | 0.56 (0.46, 0.71)                | -0.524      | 0.600   |
| 3 $\beta$ -Cholic acid                                | 1 811.27 (143.74, 9 635.12)     | 2 260.49 (316.05, 5 541.74)      | -0.044      | 0.965   |

Data are presented as median (25% quantile, 75% quantile). P-values were calculated by Mann-Whitney U-test. BVN: behavior normal; BVI: behavior impaired.
